# Supplementary material for: Atrial Fibrillation Is Associated With Mortality in Intermediate Surgical Risk Patients With Severe Aortic Stenosis: Analyses From the PARTNER 2A and PARTNER S3i Trials
Source: PubMed Central journal article supplement — J Am Heart Assoc. 2021 Mar 23;10(7):e019584. doi: 10.1161/JAHA.120.019584 (PMC8174321; doi:10.1161/jaha.120.019584), 2021-03-23
Supplement: JAH3-10-e019584-s001.pdf [file JAH3-10-e019584-s001.pdf]

# **Supplemental Material**

**Table S1. Baseline echocardiographic characteristics of TAVR patients.**

|                                            | Overall     | SR/SR       | SR/AF       | AF/AF       | P-value,<br>All groups | P-value,<br>SR/AF vs.<br>AF/AF | P-value,<br>SR/AF vs.<br>SR/SR | P-value,<br>SR/SR vs.<br>AF/AF |
|--------------------------------------------|-------------|-------------|-------------|-------------|------------------------|--------------------------------|--------------------------------|--------------------------------|
| LV EF (%)                                  | 57.1 (12.2) | 57.7 (11.9) | 54.8 (13.5) | 54.5 (12.8) | <0.0001                | 0.89                           | 0.07                           | <0.0001                        |
| LVEDd (cm)                                 | 4.74 (0.71) | 4.73 (0.72) | 4.91 (0.52) | 4.78 (0.69) | 0.11                   | 0.19                           | 0.06                           | 0.26                           |
| LVESd (cm)                                 | 3.26 (0.85) | 3.22 (0.85) | 3.46 (0.76) | 3.38 (0.85) | 0.003                  | 0.48                           | 0.04                           | 0.004                          |
| LA dimension (cm)                          | 4.32 (0.70) | 4.21 (0.65) | 4.26 (0.59) | 4.81 (0.69) | <0.0001                | <0.0001                        | 0.53                           | <0.0001                        |
| LA volume index<br>(mL/m <sup>2</sup> )    | 42.6 (14.7) | 40.0 (12.7) | 44.9 (15.2) | 53.3 (17.9) | <0.0001                | 0.002                          | 0.009                          | <0.0001                        |
| MR, mod-severe (%)                         | 10.5%       | 8.9%        | 16.4%       | 17.3%       | <0.0001                | 0.87                           | 0.06                           | <0.0001                        |
| TR, mod-severe (%)                         | 9.6%        | 5.0%        | 18.0%       | 29.0%       | <0.0001                | 0.11                           | <0.001                         | <0.0001                        |
| RVSP (mmHg)                                | 35.4 (12.8) | 33.7 (12.2) | 38.8 (14.4) | 40.8 (12.9) | <0.0001                | 0.36                           | 0.009                          | <0.0001                        |
| RV size, moderate-<br>severely dilated (%) | 3.5%        | 1.6%        | 11.8%       | 10.9%       | <0.0001                | 0.89                           | <0.0001                        | <0.0001                        |
| RV dysfunction,<br>moderate-severe (%)     | 4.5%        | 3.4%        | 8.8%        | 9.2%        | 0.008                  | 0.94                           | 0.10                           | 0.004                          |

All values presented as means with standard deviation (s.d.) in parentheses, or percentages. SR/SR = baseline sinus rhythm/discharge sinus rhythm, SR/AF = baseline SR/discharge AF, AF/AF = baseline AF/discharge AF, LV = left ventricular ejection fraction, LVEDd = left ventricular end-diastolic dimension, LVESd = left ventricular end-systolic dimension, LA = left atrial, MR = mitral regurgitation, TR = tricuspid regurgitation, RVSP = right ventricular systolic pressure, RV = right ventricular. N for LV EF = 1,820; LVEDd = 1,689; LVESd = 1,657; LA dimension = 1,705; LA volume index = 1,602; MR = 1,717; TR = 1,675; RVSP = 1,272; RV size = 781; RV function = 778.

**Table S2. Baseline echocardiographic characteristics of SAVR patients.**

|                                            | Overall     | SR/SR       | SR/AF       | AF/AF       | P-value,<br>All groups | P-value,<br>SR/AF vs.<br>AF/AF | P-value,<br>SR/AF vs.<br>SR/SR | P-value,<br>SR/SR vs.<br>AF/AF |
|--------------------------------------------|-------------|-------------|-------------|-------------|------------------------|--------------------------------|--------------------------------|--------------------------------|
| LV EF (%)                                  | 54.4 (11.6) | 54.9 (11.6) | 54.3 (13.0) | 51.6 (10.0) | 0.03                   | 0.09                           | 0.59                           | 0.006                          |
| LVEDd (cm)                                 | 4.57 (0.71) | 4.52 (0.71) | 4.70 (0.68) | 4.69 (0.68) | 0.01                   | 0.90                           | 0.02                           | 0.03                           |
| LVESd (cm)                                 | 3.21 (0.84) | 3.17 (0.84) | 3.26 (0.86) | 3.37 (0.78) | 0.07                   | 0.32                           | 0.33                           | 0.03                           |
| LA dimension (cm)                          | 4.17 (0.67) | 4.04 (0.61) | 4.25 (0.62) | 4.73 (0.72) | <0.0001                | <0.0001                        | 0.001                          | <0.0001                        |
| LA volume index<br>(mL/m <sup>2</sup> )    | 40.7 (13.5) | 38.1 (11.5) | 42.1 (11.8) | 52.3 (17.9) | <0.0001                | <0.0001                        | 0.003                          | <0.0001                        |
| MR, mod-severe (%)                         | 17.9%       | 15.4%       | 22.8%       | 26.0%       | 0.02                   | 0.59                           | 0.07                           | 0.01                           |
| TR, mod-severe (%)                         | 15.2%       | 11.6%       | 18.2%       | 30.3%       | <0.0001                | 0.05                           | 0.07                           | <0.0001                        |
| RVSP (mmHg)                                | 37.4 (12.8) | 36.1 (12.4) | 40.0 (13.3) | 40.4 (13.2) | 0.004                  | 0.85                           | 0.02                           | 0.006                          |
| RV size, moderate-<br>severely dilated (%) | 4.3%        | 2.6%        | 1.9%        | 15.6%       | <0.0001                | 0.0006                         | 0.70                           | <0.0001                        |
| RV dysfunction,<br>moderate-severe (%)     | 5.2%        | 3.6%        | 3.9%        | 14.7%       | <0.0001                | 0.008                          | 0.88                           | <0.0001                        |

All values presented as means with standard deviation (s.d.) in parentheses, or percentages. Abbreviations as in Table S1. N for LV EF = 769; LVEDd = 704; LVESd = 699;

LA dimension = 732; LA volume index = 629; MR = 719; TR = 682; RVSP = 498; RV size = 699; RV function = 695.
